# Supplementary material
Source: Springer Nature journal article supplement (https://www.springermedizin.de/resource/supplementary/12879_2012_2159_MOESM2_ESM.pdf/9443838)
Supplement: MOESM2 [file 9443838]

Gynecologists of  
the outbreak area  
(n = 3)

Screening:

- all exposed pregnant women
- acute and follow up serum

Health authority Jena

Pregnant women tested for  
*C. burnetii* infection  
n = 65

Remaining gynecologists  
in Jena  
(n = 15)

Screening:

- pregnant women with risk  
of exposure or with  
complication during  
pregnancy

University Hospital Jena

Pregnant women tested for  
*C. burnetii* infection  
n = 18

Reported deliveries  
in the  
outbreak area  
n = 52

n = 14

Screened  
pregnant women  
n = 82\*

Six women with *Coxiella burnetii* infection in pregnancy
